# Supplementary material for: Diurnal Differences in Human Muscle Isometric Force In Vivo Are Associated with Differential Phosphorylation of Sarcomeric M-Band Proteins
Source: Proteomes. 2020 Aug 26;8(3):22. doi: 10.3390/proteomes8030022 (PMC7565642; doi:10.3390/proteomes8030022)
Supplement: Supplementary file 1 [file proteomes-08-00022-s001.xlsx]

## Sheet: Plain Format
accession	peptide	Evening	Morning	p.val	log.FC	label	PubMed.ID
ABCD2	IYHLPDAESDEDEDFK_[9] Phospho	263614	1.06231e+06	0.0477018	-2.0107	ABCD2_pS705
1433E	AAFDDAIAELDTLSEESYK_[14] Phospho	319201	1.2402e+06	0.0104749	-1.95804	1433E_pS210
AAKB2	IMVGSTDDPSVFSLPDSK_[6] Phospho	112533	252059	0.0185429	-1.16341	AAKB2_pT40
AAMDC	ETGTEHSPGVQPADVK_[2] Phospho	193861	336284	0.0322859	-0.794659	AAMDC_pT43
AHNK	VSVGAPDLSLEASEGSIK_[16] Phospho	225248	787073	0.00483845	-1.80498	ANHK_pS407
AHNK	GGADVSGGVSAPDISLGEGHLSVK_[22] Phospho	192002	413245	0.012724	-1.10587	AHNK_pS5589
AHNK	SPSLDVTVPEAELNLETPEISVGGK_[3] Phospho	46938.4	157986	0.0296157	-1.75096	AHNK_pS4995
AHNK	GGVTGSPEASISGSKGDLK_[14] Phospho	228641	532097	0.0369121	-1.21861	AHNK_pS5739
ALDR	VFDFELSSQDMTTLLSYNR_[8] Phospho|[11] Oxidation	163288	279796	0.0213998	-0.776953	ALDR
AMRP	HAESVGDGER_[4] Phospho	24321.3	102837	0.0236385	-2.08007	AMRP_pS310
API5	ASEDTTSGSPPKK_[9] Phospho	76559.7	314203	0.00415319	-2.03704	API5_pS464
APOL1	VTEPISAESGEQVER_[6] Phospho	1.16962e+06	702329	0.0428175	0.735825	APOL1_pS311
ARHG6	KPSEEEYVIR_[3] Phospho	193103	466273	0.042077	-1.2718	ARHG6_pS640
BIN1	GNKSPSPPDGSPAATPEIR_[6] Phospho|[11] Phospho	388174	1.05405e+06	0.0206136	-1.44117	BIN1_pS298_pS303
BIN1	GNKSPSPPDGSPAATPEIR_[4] Phospho|[6] Phospho	2.20991e+06	5.47583e+06	0.0420668	-1.30909	BIN1_pS296_pS98
BNIP3	ASETDTHSIGEK_[8] Phospho	37988.5	69635.3	0.0212071	-0.874256	BNIP3_pS151
CACB1	SGDNSSSSLGDVVTGTR_[8] Phospho	365173	655192	0.0158701	-0.843337	CACB1_pS193
CALU	VHNDAQSFDYDHDAFLGAEEAK_[7] Phospho	95321.2	331582	0.0130879	-1.7985	CALU_pS44
CALX	AEEDEILNRSPR_[10] Phospho	4.44036e+06	8.4323e+06	0.0485081	-0.92525	CALX_pS583
CASP3	IIHGSESMDSGISLDNSYK_[7] Phospho|[8] Oxidation	15478.9	106698	0.027801	-2.78516	CASP3_pS26
CMYA5	EETKPASPHSVLPDSVPAIK_[3] Phospho	58213.9	227199	0.0304172	-1.96452	CMYA5
CSN1	EGSQGELTPANSQSR_[3] Phospho	30154.2	104920	0.0114052	-1.79886	CSN1_pS474	26986008;
DCLK1	SSQHGGSSTSLASTK_[9] Phospho	7992.64	33679.8	0.0096452	-2.07514	DCLK1_pT354
DPYL3	GSPTRPNPPVR_[2] Phospho	6.07802e+06	9.34717e+06	0.0103227	-0.620929	DPYL3_pS522	26555036; 16611631; 15466863
ENOB	SGETEDTFIADLVVGLCTGQIK_[4] Phospho|[17] Carbamidomethyl	470095	818315	0.00847152	-0.799705	ENOB_pT375
ESTD	AFSGYLGTDQSK_[11] Phospho	232439	376318	0.0181992	-0.695097	ESTD_pS197
ESTD	AFSGYLGTDQSK_[8] Phospho	458652	835321	0.0461306	-0.864932	ESTD_pT194
F122A	SNSAPLIHGLSDTSPVFQAEAPSAR_[3] Phospho	281799	543103	0.0331233	-0.946557	F122A_pS37
F16P2	VPLILGSPEDVQEYLTCVQK_[16] Phospho|[17] Carbamidomethyl	42074.8	118963	0.0216714	-1.49949	F16P2
FLNC	LGSFGSITR_[3] Phospho|[6] Phospho	210133	621263	0.0122179	-1.5639	FLNC_pS2233_pS2236
FNTA	HSTENDSPTNVQQ_[7] Phospho	48503.8	136173	0.0274948	-1.48927	FNTA_pS373
G3P	VVDLMAHMASKE_[8] Oxidation|[10] Phospho	96831.3	202976	0.0321929	-1.06776	G3P_pS333
GLRX1	DCIGGCSDLVSLQQSGELLTR_[2] Carbamidomethyl|[6] Carbamidomethyl|[7] Phospho	85899.8	247036	0.00723233	-1.52399	GLRX1_pS84
GPC5B	AFSMDEHNAALR_[3] Phospho|[4] Oxidation	8686.29	31689.7	0.0392076	-1.8672	GPC5B_pS337
GRSF1	THVGSYK_[5] Phospho	69720.6	164634	0.0313453	-1.2396	GRSF1_pS335
GSHB	QIEINTISASFGGLASR_[10] Phospho	2.11943e+06	4.09938e+06	0.0261814	-0.951727	GSHB_pS151
GSTP1	ALPGQLKPFETLLSQNQGGK_[14] Phospho	97368.6	284801	0.0230672	-1.54843	GSTP1_pS135
GYS1	HSSPHQSEDEEDPR_[7] Phospho	20108.8	112567	0.0274398	-2.48489	GYS1_pS657	22510711; 20153492
HAP28	SLDSDESEDEEDDYQQK_[4] Phospho	330609	699112	0.0352615	-1.0804	HAP28_pS60
HN1	NSSEASSGDFLDLK_[3] Phospho	831457	1.98261e+06	0.0206147	-1.25369	HN1_pS88
HN1	RNSSEASSGDFLDLK_[4] Phospho	4.92468e+06	1.11117e+07	0.0357948	-1.17398	HN1_pS88
HS90A	EVSDDEAEEKEDK_[3] Phospho	21440.5	64999.1	0.000344374	-1.60008	HS90A_pS231
HS90A	ESEDKPEIEDVGSDEEEEK_[13] Phospho	732114	1.31193e+06	0.0418534	-0.841554	HS90A_pS263
HS90A	EVSDDEAEEK_[3] Phospho	134898	561861	0.0479515	-2.05834	HS90A_pS231
HS90B	EISDDEAEEEKGEK_[3] Phospho	696911	1.64186e+06	1.74e-05	-1.23628	HS90B_pS226	29854279; 25995454; 18591256; 15581363; 2492519.
HS90B	IEDVGSDEEDDSGKDK_[6] Phospho	2.04759e+06	4.74874e+06	4.99e-05	-1.21362	HS90B_pS255	29854279; 25995454; 18591256; 15581363; 2492519.
HS90B	EKEISDDEAEEEK_[5] Phospho	374726	1.04651e+06	0.0174473	-1.48168	HS90B_pS226	29854279; 25995454; 18591256; 15581363; 2492519.
HS90B	EKEISDDEAEEEKGEK_[5] Phospho	1.56094e+06	4.13989e+06	0.0310829	-1.40717	HS90B_pS226	29854279; 25995454; 18591256; 15581363; 2492519.
HSP7C	GPAVGIDLGTTYSCVGVFQHGK_[12] Phospho|[14] Carbamidomethyl	67011.2	130263	0.00805017	-0.958953	HSP7C_pY15
HSPB7	SFHSSSSSSSSSTSSSASR_[8] Phospho	295713	627796	0.0271531	-1.0861	HSPB7_pS22
HSPB7	SFHSSSSSSSSSTSSSASR_[10] Phospho	74179.3	222132	0.0364426	-1.58233	HSPB7_pS23
HSPB7	SFHSSSSSSSSSTSSSASR_[1] Phospho	8.18505e+06	1.16471e+07	0.0365764	-0.508908	HSPB7_pS14
HSPB7	SFHSSSSSSSSSTSSSASR_[10] Phospho|[11] Phospho	1476.16	40961	0.0392273	-4.79433	HSPB7_pS23_S24
JPH1	HSHSPASSPKPLK_[4] Phospho|[8] Phospho	142113	560542	0.00538687	-1.97979	JPH1_pS475_pS479
JPH1	GTTPPRSPEASPK_[3] Phospho|[7] Phospho	452225	962360	0.0161676	-1.08954	JPH1_pT461_pS465
JPH1	TSLASLR_[2] Phospho|[5] Phospho	71821.2	262944	0.0476675	-1.87227	JPH1_pS161_pS165
JPH2	ETPRPEGGSPSPAGTPPQPK_[9] Phospho|[15] Phospho	737509	1.66795e+06	0.0198754	-1.17734	JPH2_pS484_pT490
KAP2	GDSESEEDEDLEVPVPSR_[3] Phospho	471010	1.05085e+06	0.0336443	-1.15772	KAP2_pS78
KAPCA	TWTLCGTPEYLAPEIILSK_[3] Phospho|[5] Carbamidomethyl	326392	785895	0.00336592	-1.26773	KAPCA_pT198	23942052; 22493239; 22154087; 21229324; 16026785; 15481030
KCRM	LNYKPEEEYPDLSK_[13] Phospho	5.56718e+06	1.36926e+07	0.00074767	-1.29838	KCRM_pS24
KCRM	GYTLPPHCSR_[2] Phospho|[8] Carbamidomethyl	739089	1.3761e+06	0.00474058	-0.896769	KCRM_pY140
KHDR1	SGSMDPSGAHPSVR_[3] Phospho|[4] Oxidation	49346.8	132871	0.0165417	-1.429	KHDR1_pS20
KLH41	VYGHNVISHK_[2] Phospho	35528.3	70304.2	0.00387295	-0.984643	KLH41_pY438
KPB1	RLSISAESQSPGTSMTPSSGSFPSAYDQQSSK_[3] Phospho|[15] Oxidation	558256	1.22864e+06	0.0109872	-1.13806	KPB1_pS1018
LMNA	LRLSPSPTSQR_[4] Phospho	44103.3	113792	0.032412	-1.36744	LMNA_pS390	23870088; 19165338; 18815303.
LMO7	SHSPSASQSGSQLR_[3] Phospho	127963	438075	0.0123623	-1.77545	LMO7_pS1593
LMO7	LPSPTSPFSSLSQDQAATSK_[3] Phospho	94434.5	347570	0.0126209	-1.87992	LMO7_pS988
LMO7	TSTTGVATTQSPTPR_[11] Phospho	33338.1	182684	0.0292665	-2.45411	LMO7_pS1586
LMO7	MYSFDDVLEEGK_[1] Oxidation|[3] Phospho	40094.6	251020	0.035884	-2.64632	LMO7_pS805
LMO7	RGESLDNLDSPR_[4] Phospho	27746.5	131737	0.0368618	-2.24728	LMO7_pS1510
LNP	LPEFSFEKR_[5] Phospho	26316.1	79052.2	0.0414275	-1.58686	LNP_pS321
LS14A	SPTMEQAVQTASAHLPAPAAVGR_[1] Phospho	215266	720598	0.0100299	-1.74307	LS14A_pS192
MARCS	AEDGATPSPSNETPKK_[13] Phospho	83475.9	278940	0.0132739	-1.74052	MARCS_pT150
MARCS	GEPAAAAAPEAGASPVEK_[14] Phospho	20811.4	305158	0.0442514	-3.87411	MARCS_pS101
MFF	ERSMSENAVR_[4] Oxidation|[5] Phospho	6574.64	31017.8	0.0222379	-2.23811	MFF_pS157	21725060
MK14	HTDDEMTGYVATR_[6] Oxidation|[7] Phospho	60057.2	154027	0.0368948	-1.35878	MK14_pT180	27342398; 27280388; 26959880; 26699492; 26655500; 26822034; 27577261; 26359454; 25435370; 25944695
MLIP	AEYVLIVDSEGEDEAASR_[9] Phospho	703155	1.67505e+06	0.0427417	-1.25229	MLIP_S135
MLRV	AGGANSNVFSMFEQTQIQEFK_[6] Phospho|[11] Oxidation	2.10495e+07	3.11469e+07	0.0374841	-0.565301	MLRV_pS15
MURC	LSSVTEDEDQDAALTIVTVLDK_[3] Phospho	196905	821651	0.0308114	-2.06103	MURC_pS20
MYG	HLKSEDEMK_[4] Phospho|[8] Oxidation	386666	913906	0.0216866	-1.24096	MYG_pS52
MYOM2	RVSTQEDEEQENR_[3] Phospho	23518.3	55675.7	0.000544166	-1.24326	MYOM2_pS76	9529381
NACAM	DSPATTHSPTPPSPK_[13] Phospho	891913	1.79831e+06	0.0261693	-1.01166	NACAM
NEB2	ASSLNENVDHSALLK_[3] Phospho	12459.6	49814.2	0.0422834	-1.99929	NEB2_pS100
NEST	SLGEQDQMTLRPPEK_[1] Phospho|[8] Oxidation	829811	3.31166e+06	0.0420638	-1.9967	NEST_pS768
NUCB1	AQRLSQETEALGR_[5] Phospho	23923.8	116381	0.013833	-2.28234	NUCB1_pS369
NUCKS	EEDEEPESPPEKK_[8] Phospho	749093	1.48688e+06	0.00296698	-0.989071	NUCKS_pS214
NUCKS	EEDEEPESPPEK_[8] Phospho	581464	1.50736e+06	0.0424148	-1.37426	NUCKS_pS214
ODPA	YHGHSMSDPGVSYR_[5] Phospho|[6] Oxidation|[12] Phospho	311635	1.9526e+06	0.0185466	-2.64747	ODPA_pS293_pS300	28692044; 29070699; 28196867; 27641336; 27856638; 28591165; 29263907; 27357730; 27049945; 27050525
PAXI	FIHQQPQSSSPVYGSSAK_[10] Phospho	252983	520339	0.0156313	-1.04041	PAXI_pS85
PBDC1	GADSGEEKEEGINR_[4] Phospho	54584.4	132169	0.00219533	-1.27583	PBDC1_pS197
PDE4B	LMHSSSLNNTSISR_[2] Oxidation|[6] Phospho	30583	167347	0.049705	-2.45204	PDE4B_pS319
PEBP1	NRPTSISWDGLDSGK_[7] Phospho	18055.7	51956.2	0.0284138	-1.52484	PEBP1_pS54
PLIN5	RSQAELETLVLSR_[2] Phospho	21952.6	61617.4	0.0356774	-1.48895	PLIN5_pS277
PML	SSPEQPRPSTSK_[2] Phospho	102849	893546	0.00859803	-3.11902	PML_pS512
PPLA	RASTIEMPQQAR_[3] Phospho	1.72777e+06	2.52068e+06	0.00558784	-0.5449	PPLA_pS16
PPLA	ASTIEMPQQAR_[2] Phospho|[3]	1.97991e+06	4.39901e+06	0.00683275	-1.15175	PPLA_pS16_pT17	28343149; 25320082; 25024212; 18957419; 18708665; 17560599; 17548345; 17416610
PPLA	RASTIEMPQQAR_[3] Phospho|[7] Oxidation	1.22233e+07	1.67354e+07	0.0337189	-0.453272	PPLA_pS16	28343149; 25320082; 25024212; 18708665; 17416610; 15728587
PRDX2	LSEDYGVLKTDEGIAYR_[10] Phospho	246261	496496	0.0120812	-1.01159	PRDX2_pT120
PROB1	TPPTAPEPAAAVQAPLPR_[1] Phospho	1.00588e+06	1.70066e+06	0.0257605	-0.757638	PROB1
PSD11	EASIDILHSIVK_[3] Phospho	70778.3	113594	0.0481311	-0.682502	PSD11_pS23
RABE1	GSVHSLDAGLLLPSGDPFSK_[5] Phospho	31066.8	70846.7	0.0345225	-1.18933	RABE1_pS377
RCAS1	KLSGDQITLPTTVDYSSVPK_[3] Phospho	139758	457309	0.0181794	-1.71024	RCAS1_pS36
ROA1	SESPKEPEQLR_[3] Phospho	684792	2.56522e+06	0.00641283	-1.90535	ROA1_pS6
RRAS2	FQEQECPPSPEPTR_[6] Carbamidomethyl|[9] Phospho	26467.2	99655.8	0.0229514	-1.91275	RRAS2_pS186	27086924;
RTN4	GSSGSVDETLFALPAASEPVIR_[9] Phospho	82041.7	282620	0.00358278	-1.78443	RTN4_pT188
SC31A	AQGEPVAGHESPK_[11] Phospho	203379	447333	0.0226431	-1.13718	SC31A_pS799
SC31A	EQTLSPTITSGLHNIAR_[5] Phospho	261404	694221	0.0385815	-1.40911	SC31A_pS1163
SELW	GDGYVDTESK_[9] Phospho	7322.23	41282	0.0418218	-2.49516	SELW_pS71
SGCA	VDSAQVPLILDQH_[3] Phospho	675646	1.04561e+06	0.0250427	-0.630009	SGCA_pS377
SIR2	EHASIDAQSGAGVPNPSTSASPK_[21] Phospho	48841	167009	0.0118965	-1.77376	SIR2_pS368	29694890; 18332217; 17516032; 17488717
SLAI2	SGAVQGAGSLGPGSPVR_[14] Phospho	199794	287545	0.0350848	-0.525274	SLAI2_pS48
SLAI2	AGASIPSSGAASPR_[12] Phospho	128641	234624	0.0439914	-0.866998	SLAI2_pS63
SMTL2	FASHATFSLSGR_[6] Phospho|[8] Phospho	249197	616984	0.00867824	-1.30795	SMTL2_pT125_pS127
SODC	DGVADVSIEDSVISLSGDHCIIGR_[7] Phospho|[20] Carbamidomethyl	79016.5	194481	0.0425158	-1.29941	SODC_pS99
SRCA	AITQELPGLLGSLGLGK_[12] Phospho	86031.8	176254	0.0142731	-1.03472	SRCA_pS904
SRRM1	EKTPELPEPSVK_[3] Phospho	101176	291768	0.0208855	-1.52795	SRRM1_pT220
STBD1	NESLESPMGEWGFQK_[3] Phospho|[8] Oxidation	42246.2	128339	0.0216736	-1.60306	STBD1_pS145
STIM1	SHSPSSPDPDTPSPVGDSR_[3] Phospho	151733	284069	0.0354664	-0.90471	STIM1_pS618
SYNCI	RLSAQFENLMAESR_[3] Phospho	52731.8	101604	0.0250734	-0.946219	SYNCI_pS325
SYNEM	SVISDEK_[1] Phospho	9000.16	58951.1	0.0273769	-2.7115	SYNEM_pS1540
SYNP2	AQSPTPSLPASWK_[3] Phospho	222465	427174	0.0369819	-0.941249	SYNP2_pS902
TAU	TDHGAEIVYKSPVVSGDTSPR_[11] Phospho|[19] Phospho	49271.8	186497	0.0116312	-1.92031	TAU_pS713_pS721
TAU	ASPAQDGRPPQTAAR_[2] Phospho	61948.8	193446	0.012187	-1.64278	TAU_pS238
TAU	IGSLDNITHVPGGGNK_[3] Phospho	366538	588855	0.0247907	-0.68395	TAU_pS673
TAU	DVDESSPQDSPPSK_[6] Phospho	229328	834746	0.0293416	-1.86392	TAU_pS228
TB22A	SQSLPHSATVTLGGTSDPSTLSSSALSER_[11] Phospho	141055	373679	0.0287346	-1.40554	TB22A_pT175
TCOF	ASSVSTKESPAR_[9] Phospho	8350.96	58864	0.00885031	-2.81737	TCOF_pS233
TELT	SMSQEAQR_[2] Oxidation|[3] Phospho	83405.3	353184	0.0272323	-2.08221	TELT_pS161	24280220;
TITIN	AVSPTETKPTPTEK_[3] Phospho	1.48451e+07	3.25652e+07	0.00070773	-1.13334	TITIN_pS33624
TITIN	VKSPEAVKSPK_[3] Phospho|[9] Phospho	3.10168e+06	7.45786e+06	0.0279605	-1.26571	TITIN_pS33602_pS33608
TITIN	SRSPTPPSIAAK_[3] Phospho	4.6896e+06	8.65027e+06	0.0381778	-0.88328	TITIN_pS265
TM38A	SKEELSEGSRK_[9] Phospho	256445	781219	0.0473084	-1.60708	TM38A_pS290
TOM70	ASPAPGSGHPEGPGAHLDMNSLDR_[2] Phospho|[19] Oxidation	240999	667281	0.000309889	-1.46927	TOM70_pS91	22645316
TPIS	KQSLGELIGTLNAAK_[3] Phospho	1.79537e+07	2.68306e+07	0.0494285	-0.579594	TPIS_pS58
TTHY	TSESGELHGLTTEEEFVEGIYK_[12] Phospho	17107.2	42671.9	0.0369059	-1.31868	TTHY_pT80
UBE2O	KEDKPEGQSPVK_[9] Phospho	844.818	26883.5	0.0270366	-4.99194	UBE2O_pS896
VAPB	SLSSSLDDTEVKK_[5] Phospho	31694.7	51861.9	0.0362914	-0.710432	VAPB_pS160
VIME	TYSLGSALRPSTSR_[3] Phospho	255414	955862	0.0223562	-1.90396	VIME_pS39	26369929; 25908861; 24073199; 22720028; 20856200; 19291697; 17024653
XIRP1	KFEEGSFANSTDQEPTRPQPGGGDVR_[11] Phospho	21540.5	138282	0.00875055	-2.68248	XIRP1_pT139
XIRP1	NLFETLPLDSIGQGEVLAHGSPSR_[23] Phospho	54603.5	431336	0.0404657	-2.98175	XIRP1
XIRP1	LGSRPSLQEQSPLELR_[3] Phospho|[6] Phospho	265255	709389	0.0436248	-1.4192	XIRP1_pS205_pS208
